# Supplementary material for: Two new 6-nitrobenzimidazole ligand-modified polymolybdate-based metal–organic complexes with excellent capacitive and electrocatalytic performances
Source: Royal Society of Chemistry journal article supplement (doi:10.1039/d3nj04841a), 2023-12-08
Supplement: d3nj04841a1.pdf [file d3nj04841a1.pdf]

## Supporting Information

### **6-nitrobenzimidazole ligand modified two new polymolybdate-based metal-organic complexes with excellent capacitive and electrocatalytic performances**

**Ju-Ju Liang & Yu-Chen Zhang, Zhi-Han Chang, Yong-Zhen Chen, Ke-Ke Chen, Jun-Jun Lu, Xiu-Li Wang\***

College of Chemistry and Materials Engineering, Bohai University, Liaoning Professional Technology Innovation Center of Liaoning Province for Conversion Materials of Solar Cell, Jinzhou 121013, P. R. China

Email: [wangxiuli@bhu.edu.cn](mailto:wangxiuli@bhu.edu.cn)

### **Synthesis of $(\text{NH}_4)_6[\text{TeMo}_6\text{O}_{24}] \cdot 7\text{H}_2\text{O}$**

$(\text{NH}_4)_6[\text{TeMo}_6\text{O}_{24}] \cdot 7\text{H}_2\text{O}$  was synthesized by dissolving 2.73 g  $\text{Na}_2\text{TeO}_4 \cdot 2\text{H}_2\text{O}$  and 10.5 g  $(\text{NH}_4)\text{Mo}_7\text{O}_{24} \cdot 4\text{H}_2\text{O}$  in 150 mL deionized water, heated and evaporated to 100ml under stirring conditions. After cooling and standing for 5 days, a colorless solid  $(\text{NH}_4)_6[\text{TeMo}_6\text{O}_{24}] \cdot 7\text{H}_2\text{O}$  was obtained<sup>1</sup>.

### **Preparations of 1–2–modified carbon paste electrodes (1–/2–CPE)**

The nano-graphite powder (0.1 g) and the complex **1** or **2** (0.015 g) were accurately weighed and mixed thoroughly with grinding in a mortar for 45 min, and an appropriate amount of paraffin oil was added dropwise to the ground powder and stirred to a paste-like mixture. The above substances were transferred to a glass tube with an inner diameter of 3 mm, compacted with a copper rod, and the electrode surface was polished to smooth with a weighing paper.

Table S1 The bond lengths and bond angles of complex **1**

| Complex <b>1</b> |          |         |          |
|------------------|----------|---------|----------|
| Cu1-O1#2         | 2.382(3) | Cu1-O1W | 2.080(3) |

|              |            |             |            |
|--------------|------------|-------------|------------|
| Cu1-N2       | 1.981(3)   | Cu1-O2      | 2.379(2)   |
| Cu1-O3       | 1.936(2)   | Cu1-N1      | 1.988(3)   |
| O3-Cu1-O1W   | 90.31(10)  | O2-Cu1-O1#2 | 158.71(9)  |
| O3-Cu1-O2    | 83.48(9)   | N1-Cu1-O1W  | 176.47(12) |
| O3-Cu1-O1#2  | 87.65(10)  | N1-Cu1-O2   | 104.11(11) |
| O3-Cu1-N1    | 87.81(11)  | N1-Cu1-O1#2 | 94.80(12)  |
| O3-Cu1-N2    | 173.87(11) | N2-Cu1-O1W  | 90.94(12)  |
| O1W-Cu1-O2   | 78.62(10)  | N2-Cu1-O2   | 90.89(11)  |
| O1W-Cu1-O1#2 | 82.13(10)  | N2-Cu1-O1#2 | 98.47(11)  |
|              |            | N2-Cu1-N1   | 91.24(13)  |

Symmetry code for **1**: #1 1-x,-y,2-z

Table S2 The bond lengths and bond angles of complex **2**

| Complex <b>2</b> |            |             |           |
|------------------|------------|-------------|-----------|
| Cu1-O1W          | 1.994(4)   | Cu1-O2W     | 2.372(5)  |
| Cu1-O1           | 1.974(4)   | Cu1-N2      | 2.006(5)  |
| Cu1-N1           | 2.004(5)   | O1-Cu1-N2   | 87.68(18) |
| O1-Cu1-O1W       | 179.4(2)   | O1-Cu1-O2W  | 86.81(18) |
| N1-Cu1-N2        | 172.83(19) | N1-Cu1-O2W  | 91.7(2)   |
| N2-Cu1-O2W       | 92.0(2)    | O1W-Cu1-N1  | 94.1(2)   |
| O1W-Cu1-N2       | 91.8(2)    | O1W-Cu1-O2W | 93.0(2)   |
| O1-Cu1-N1        | 86.38(18)  |             |           |

Symmetry code for **2**: #1 1-x,1-y,1-z

Fig. S1. The IR spectra of complexes **1–2**.

Fig. S2 The PXRD patterns of complexes **1–2**.

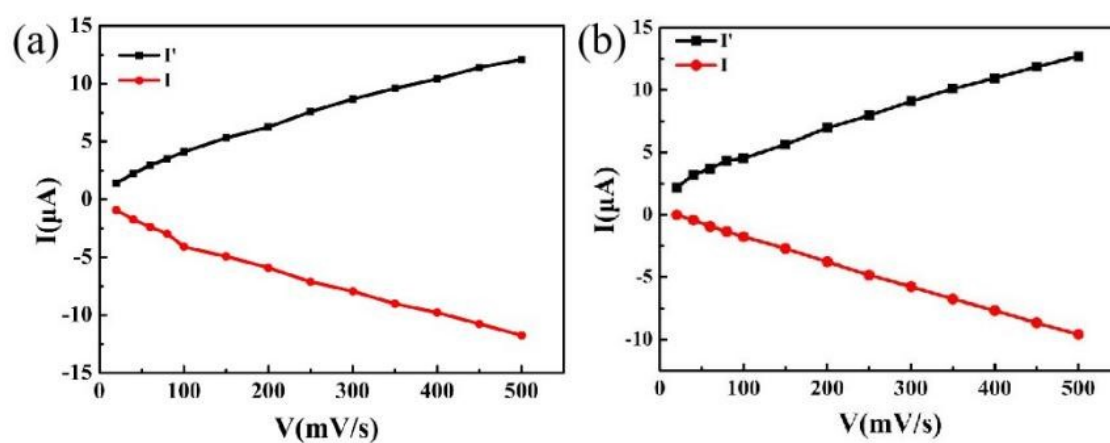

Fig. S3 The plots of peak currents vs. scan rates of complexes 1–2.

1. C. I. Cabello, Botto, I. L., Cabrerizo, F., González, M. G., & Thomas, H. J., *Adsorption Science & Technology*, 2000, **18(7)**, 591-608.
